# Supplementary material
Source: Springer Nature journal article supplement (https://www.springermedizin.de/resource/supplementary/13017_2007_62_MOESM2_ESM.pdf/9635388)

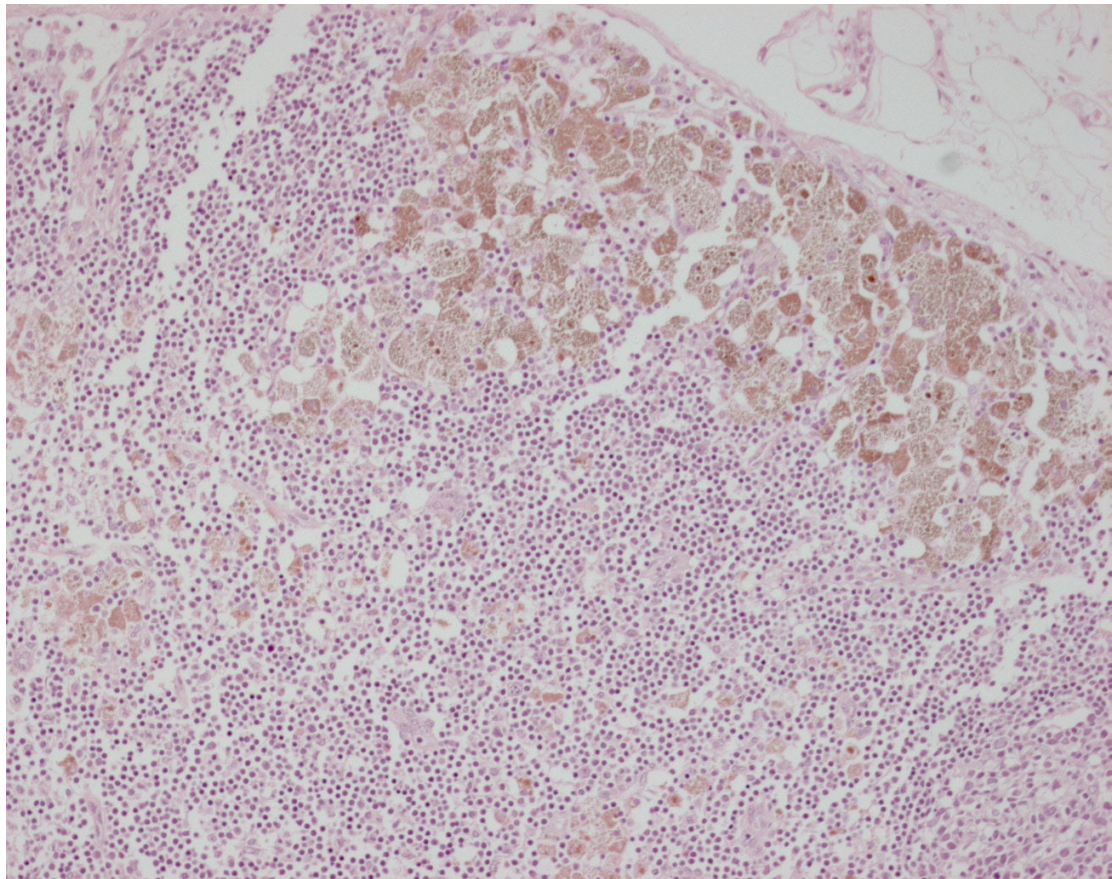

Supplement: MOESM2 [file 9635388]
